# Supplementary material for: Relevance of cancer cachexia models – muscle whole genome gene expression in human and animal cachexia
Source: Research Square preprint supplement (doi:10.21203/rs.3.rs-56696/v1), 2020-10-26
Supplement: Supplementary file 1 [file 5fbc0745226c16dc56452dcb.csv]

Experiment	FILE	TISSUE	TYPE	COLORCODE
GSE107470	GSE107470.txt	Gastr	NSCLC	magenta
GSE114820	GSE114820.txt	Gastr	LLC	cyan
GSE121972E	GSE121972E_customcdf23.txt	EDL	C26	red
GSE121972S	GSE121972S_customcdf23.txt	SOL	C26	red
GSE18832	GSE18832_customcdf23.txt	RectAbd	HUM	yellow
GSE24112	GSE24112_genemean.txt	Quad	C26	red
GSE34111	GSE34111_customcdf23.txt	Quad	HUM	yellow
GSE48363	GSE48363_customcdf23.txt	Gas+Plan	C26	red
GSE51931	GSE51931_customcdf23.txt	BicFem	PAN	green
GSE56555	GSE56555_customcdf23.txt	Tib	C26	red
GSE63032	GSE63032_customcdf23.txt	Gastr	C26	red
GSE80081	GSE80081_genemean.txt	Quad	XENO	blue
GSE85017	GSE85017_customcdf23.txt	RectAbd	HUM_NC	orange
